# Supplementary material
Source: MDPI journal article supplement (https://www.mdpi.com/2072-4292/11/14/1719)
Supplement: s1 [file s1]

# Supplementary material

Table 1. The confusion matrix of the land use/land cover classification for the image acquired from 1987 to 2017

| 1987              | Cultivated forest | Natural forest | Buildings | Farmland | HC grassland | Shrubs | Mixed forest | LC grassland | Bare land |
|-------------------|-------------------|----------------|-----------|----------|--------------|--------|--------------|--------------|-----------|
| Cultivated forest | 107               | 3              | 0         | 0        | 8            | 6      | 0            | 0            | 0         |
| Natural forest    | 5                 | 84             | 0         | 0        | 3            | 12     | 0            | 0            | 0         |
| Buildings         | 0                 | 0              | 94        | 0        | 0            | 0      | 0            | 0            | 14        |
| Farmland          | 0                 | 0              | 0         | 92       | 1            | 0      | 0            | 0            | 0         |
| HC grassland      | 15                | 21             | 0         | 8        | 112          | 12     | 0            | 0            | 0         |
| Shrubs            | 5                 | 3              | 0         | 0        | 1            | 89     | 0            | 0            | 0         |
| Mixed forest      | 0                 | 0              | 0         | 0        | 0            | 0      | 93           | 22           | 0         |
| LC grassland      | 0                 | 0              | 0         | 0        | 0            | 0      | 33           | 83           | 0         |
| Bare land         | 0                 | 0              | 6         | 0        | 0            | 0      | 0            | 0            | 86        |
| User accuracy     | 86%               | 80%            | 87%       | 99%      | 66%          | 91%    | 81%          | 72%          | 93%       |
| Producer accuracy | 81%               | 76%            | 94%       | 92%      | 89%          | 74%    | 74%          | 79%          | 86%       |
| Overall accuracy  | 82.40%            |                |           |          |              |        |              |              |           |
| Kappa coefficient | 0.8061            |                |           |          |              |        |              |              |           |

| 1988              | Cultivated forest | Natural forest | Buildings | Farmland | HC grassland | Shrubs | Mixed forest | LC grassland | Bare land |
|-------------------|-------------------|----------------|-----------|----------|--------------|--------|--------------|--------------|-----------|
| Cultivated forest | 76                | 4              | 0         | 0        | 6            | 1      | 0            | 0            | 0         |
| Natural forest    | 2                 | 94             | 0         | 0        | 3            | 7      | 0            | 0            | 0         |
| Buildings         | 0                 | 0              | 121       | 0        | 0            | 0      | 0            | 0            | 17        |
| Farmland          | 0                 | 0              | 0         | 97       | 1            | 0      | 0            | 0            | 0         |
| HC grassland      | 14                | 31             | 0         | 8        | 96           | 2      | 0            | 0            | 0         |
| Shrubs            | 7                 | 4              | 0         | 0        | 4            | 95     | 0            | 0            | 0         |
| Mixed forest      | 0                 | 0              | 0         | 0        | 0            | 0      | 84           | 24           | 0         |
| LC grassland      | 0                 | 0              | 0         | 0        | 0            | 0      | 16           | 81           | 0         |
| Bare land         | 0                 | 0              | 11        | 0        | 0            | 0      | 0            | 0            | 103       |
| User accuracy     | 88%               | 88%            | 88%       | 99%      | 63%          | 86%    | 78%          | 83%          | 91%       |
| Producer accuracy | 76%               | 71%            | 92%       | 92%      | 87%          | 90%    | 84%          | 77%          | 86%       |
| Overall accuracy  | 83.85%            |                |           |          |              |        |              |              |           |
| Kappa coefficient | 0.8217            |                |           |          |              |        |              |              |           |

| 1989              | Cultivated forest | Natural forest | Buildings | Farmland | HC grassland | Shrubs | Mixed forest | LC grassland | Bare land |
|-------------------|-------------------|----------------|-----------|----------|--------------|--------|--------------|--------------|-----------|
| Cultivated forest | 94                | 2              | 0         | 0        | 15           | 3      | 0            | 0            | 0         |
| Natural forest    | 3                 | 91             | 0         | 0        | 3            | 22     | 0            | 0            | 0         |
| Buildings         | 0                 | 0              | 108       | 0        | 0            | 0      | 0            | 0            | 15        |

[illegible][illegible][illegible]

| 1992              | Cultivated forest | Natural forest | Buildings | Farmland | HC grassland | Shrubs | Mixed forest | LC grassland | Bare land |
|-------------------|-------------------|----------------|-----------|----------|--------------|--------|--------------|--------------|-----------|
| Cultivated forest | 107               | 2              | 0         | 0        | 6            | 4      | 0            | 0            | 0         |
| Natural forest    | 3                 | 84             | 0         | 0        | 2            | 24     | 0            | 0            | 0         |
| Buildings         | 0                 | 0              | 102       | 0        | 0            | 0      | 0            | 0            | 15        |
| Farmland          | 0                 | 0              | 0         | 112      | 5            | 0      | 0            | 0            | 0         |
| HC grassland      | 15                | 15             | 0         | 14       | 104          | 12     | 0            | 0            | 0         |
| Shrubs            | 8                 | 4              | 0         | 0        | 3            | 92     | 0            | 0            | 0         |
| Mixed forest      | 0                 | 0              | 0         | 0        | 0            | 0      | 86           | 24           | 0         |
| LC grassland      | 0                 | 0              | 0         | 0        | 0            | 0      | 19           | 102          | 0         |
| Bare land         | 0                 | 0              | 8         | 0        | 0            | 0      | 0            | 0            | 117       |
| User accuracy     | 90%               | 75%            | 88%       | 96%      | 65%          | 86%    | 78%          | 84%          | 94%       |
| Producer accuracy | 81%               | 80%            | 93%       | 89%      | 87%          | 70%    | 82%          | 81%          | 89%       |
| Overall accuracy  | 83.44%            |                |           |          |              |        |              |              |           |
| Kappa coefficient | 0.8173            |                |           |          |              |        |              |              |           |

| 1993              | Cultivated forest | Natural forest | Buildings | Farmland | HC grassland | Shrubs | Mixed forest | LC grassland | Bare land |
|-------------------|-------------------|----------------|-----------|----------|--------------|--------|--------------|--------------|-----------|
| Cultivated forest | 89                | 3              | 0         | 0        | 11           | 1      | 0            | 0            | 0         |
| Natural forest    | 2                 | 94             | 0         | 0        | 5            | 6      | 0            | 0            | 0         |
| Buildings         | 0                 | 0              | 101       | 0        | 0            | 0      | 0            | 0            | 19        |
| Farmland          | 0                 | 0              | 0         | 97       | 8            | 0      | 0            | 0            | 0         |
| HC grassland      | 11                | 21             | 0         | 8        | 100          | 3      | 0            | 0            | 0         |
| Shrubs            | 3                 | 3              | 0         | 0        | 3            | 95     | 0            | 0            | 0         |
| Mixed forest      | 0                 | 0              | 0         | 0        | 0            | 0      | 102          | 15           | 0         |
| LC grassland      | 0                 | 0              | 0         | 0        | 0            | 0      | 30           | 117          | 0         |
| Bare land         | 0                 | 0              | 9         | 0        | 0            | 0      | 0            | 0            | 101       |
| User accuracy     | 86%               | 88%            | 84%       | 92%      | 69%          | 92%    | 88%          | 79%          | 92%       |
| Producer accuracy | 85%               | 78%            | 92%       | 92%      | 79%          | 90%    | 77%          | 89%          | 84%       |
| Overall accuracy  | 84.80%            |                |           |          |              |        |              |              |           |
| Kappa coefficient | 0.8321            |                |           |          |              |        |              |              |           |

| 1994              | Cultivated forest | Natural forest | Buildings | Farmland | HC grassland | Shrubs | Mixed forest | LC grassland | Bare land |
|-------------------|-------------------|----------------|-----------|----------|--------------|--------|--------------|--------------|-----------|
| Cultivated forest | 84                | 3              | 0         | 0        | 7            | 2      | 0            | 0            | 0         |
| Natural forest    | 3                 | 103            | 0         | 0        | 3            | 12     | 0            | 0            | 0         |
| Buildings         | 0                 | 0              | 115       | 0        | 0            | 0      | 0            | 0            | 14        |
| Farmland          | 0                 | 0              | 0         | 108      | 1            | 0      | 0            | 0            | 0         |
| HC grassland      | 16                | 23             | 0         | 12       | 91           | 10     | 0            | 0            | 0         |
| Shrubs            | 8                 | 3              | 0         | 0        | 3            | 86     | 0            | 0            | 0         |
| Mixed forest      | 0                 | 0              | 0         | 0        | 0            | 0      | 97           | 12           | 0         |
| LC grassland      | 0                 | 0              | 0         | 0        | 0            | 0      | 23           | 88           | 0         |
| Bare land         | 0                 | 0              | 11        | 0        | 0            | 0      | 0            | 0            | 106       |
| User accuracy     | 87%               | 85%            | 89%       | 99%      | 60%          | 86%    | 89%          | 79%          | 90%       |

|                   |        |     |     |     |     |     |     |     |     |
|-------------------|--------|-----|-----|-----|-----|-----|-----|-----|-----|
| Producer accuracy | 76%    | 78% | 91% | 90% | 87% | 78% | 81% | 88% | 88% |
| Overall accuracy  | 84.10% |     |     |     |     |     |     |     |     |
| Kappa coefficient | 0.8245 |     |     |     |     |     |     |     |     |

| 1995              | Cultivated forest | Natural forest | Buildings | Farmland | HC grassland | Shrubs | Mixed forest | LC grassland | Bare land |
|-------------------|-------------------|----------------|-----------|----------|--------------|--------|--------------|--------------|-----------|
| Cultivated forest | 86                | 3              | 0         | 0        | 11           | 3      | 0            | 0            | 0         |
| Natural forest    | 5                 | 92             | 0         | 0        | 4            | 7      | 0            | 0            | 0         |
| Buildings         | 0                 | 0              | 121       | 0        | 0            | 0      | 0            | 0            | 14        |
| Farmland          | 0                 | 0              | 0         | 106      | 2            | 0      | 0            | 0            | 0         |
| HC grassland      | 15                | 9              | 0         | 14       | 91           | 4      | 0            | 0            | 0         |
| Shrubs            | 5                 | 1              | 0         | 0        | 2            | 86     | 0            | 0            | 0         |
| Mixed forest      | 0                 | 0              | 0         | 0        | 0            | 0      | 107          | 11           | 0         |
| LC grassland      | 0                 | 0              | 0         | 0        | 0            | 0      | 25           | 99           | 0         |
| Bare land         | 0                 | 0              | 11        | 0        | 0            | 0      | 0            | 0            | 96        |
| User accuracy     | 84%               | 86%            | 89%       | 98%      | 69%          | 92%    | 91%          | 80%          | 90%       |
| Producer accuracy | 78%               | 88%            | 92%       | 88%      | 83%          | 86%    | 81%          | 90%          | 87%       |
| Overall accuracy  | 85.92%            |                |           |          |              |        |              |              |           |
| Kappa coefficient | 0.8442            |                |           |          |              |        |              |              |           |

| 1996              | Cultivated forest | Natural forest | Buildings | Farmland | HC grassland | Shrubs | Mixed forest | LC grassland | Bare land |
|-------------------|-------------------|----------------|-----------|----------|--------------|--------|--------------|--------------|-----------|
| Cultivated forest | 110               | 8              | 0         | 0        | 8            | 3      | 0            | 0            | 0         |
| Natural forest    | 4                 | 92             | 0         | 0        | 4            | 19     | 0            | 0            | 0         |
| Buildings         | 0                 | 0              | 99        | 0        | 0            | 0      | 0            | 0            | 11        |
| Farmland          | 0                 | 0              | 0         | 89       | 4            | 0      | 0            | 0            | 0         |
| HC grassland      | 11                | 28             | 0         | 11       | 80           | 6      | 0            | 0            | 0         |
| Shrubs            | 7                 | 4              | 0         | 0        | 4            | 98     | 0            | 0            | 0         |
| Mixed forest      | 0                 | 0              | 0         | 0        | 0            | 0      | 89           | 30           | 0         |
| LC grassland      | 0                 | 0              | 0         | 0        | 0            | 0      | 16           | 102          | 0         |
| Bare land         | 0                 | 0              | 11        | 0        | 0            | 0      | 0            | 0            | 95        |
| User accuracy     | 85%               | 77%            | 90%       | 96%      | 59%          | 87%    | 75%          | 87%          | 90%       |
| Producer accuracy | 83%               | 70%            | 90%       | 89%      | 80%          | 78%    | 85%          | 77%          | 90%       |
| Overall accuracy  | 81.92%            |                |           |          |              |        |              |              |           |
| Kappa coefficient | 0.8010            |                |           |          |              |        |              |              |           |

| 1997              | Cultivated forest | Natural forest | Buildings | Farmland | HC grassland | Shrubs | Mixed forest | LC grassland | Bare land |
|-------------------|-------------------|----------------|-----------|----------|--------------|--------|--------------|--------------|-----------|
| Cultivated forest | 101               | 5              | 0         | 0        | 13           | 2      | 0            | 0            | 0         |
| Natural forest    | 4                 | 94             | 0         | 0        | 5            | 10     | 0            | 0            | 0         |
| Buildings         | 0                 | 0              | 110       | 0        | 0            | 0      | 0            | 0            | 24        |
| Farmland          | 0                 | 0              | 0         | 116      | 3            | 0      | 0            | 0            | 0         |
| HC grassland      | 13                | 16             | 0         | 16       | 106          | 8      | 0            | 0            | 0         |
| Shrubs            | 2                 | 5              | 0         | 0        | 5            | 101    | 0            | 0            | 0         |

|                   |        |     |     |     |     |     |     |     |     |
|-------------------|--------|-----|-----|-----|-----|-----|-----|-----|-----|
| Mixed forest      | 0      | 0   | 0   | 0   | 0   | 0   | 106 | 34  | 0   |
| LC grassland      | 0      | 0   | 0   | 0   | 0   | 0   | 20  | 98  | 0   |
| Bare land         | 0      | 0   | 10  | 0   | 0   | 0   | 0   | 0   | 108 |
| User accuracy     | 83%    | 83% | 82% | 98% | 67% | 89% | 76% | 83% | 92% |
| Producer accuracy | 84%    | 78% | 92% | 88% | 80% | 84% | 84% | 74% | 82% |
| Overall accuracy  | 82.81% |     |     |     |     |     |     |     |     |
| Kappa coefficient | 0.8107 |     |     |     |     |     |     |     |     |

| 1998              | Cultivated forest | Natural forest | Buildings | Farmland | HC grassland | Shrubs | Mixed forest | LC grassland | Bare land |
|-------------------|-------------------|----------------|-----------|----------|--------------|--------|--------------|--------------|-----------|
| Cultivated forest | 86                | 3              | 0         | 0        | 12           | 3      | 0            | 0            | 0         |
| Natural forest    | 2                 | 107            | 0         | 0        | 5            | 24     | 0            | 0            | 0         |
| Buildings         | 0                 | 0              | 123       | 0        | 0            | 0      | 0            | 0            | 20        |
| Farmland          | 0                 | 0              | 0         | 112      | 2            | 0      | 0            | 0            | 0         |
| HC grassland      | 15                | 20             | 0         | 14       | 81           | 7      | 0            | 0            | 0         |
| Shrubs            | 2                 | 3              | 0         | 0        | 5            | 92     | 0            | 0            | 0         |
| Mixed forest      | 0                 | 0              | 0         | 0        | 0            | 0      | 91           | 17           | 0         |
| LC grassland      | 0                 | 0              | 0         | 0        | 0            | 0      | 14           | 88           | 0         |
| Bare land         | 0                 | 0              | 9         | 0        | 0            | 0      | 0            | 0            | 100       |
| User accuracy     | 83%               | 78%            | 86%       | 98%      | 59%          | 91%    | 84%          | 87%          | 92%       |
| Producer accuracy | 82%               | 81%            | 93%       | 89%      | 77%          | 73%    | 87%          | 84%          | 83%       |
| Overall accuracy  | 83.32%            |                |           |          |              |        |              |              |           |
| Kappa coefficient | 0.8160            |                |           |          |              |        |              |              |           |

| 1999              | Cultivated forest | Natural forest | Buildings | Farmland | HC grassland | Shrubs | Mixed forest | LC grassland | Bare land |
|-------------------|-------------------|----------------|-----------|----------|--------------|--------|--------------|--------------|-----------|
| Cultivated forest | 114               | 2              | 0         | 0        | 12           | 4      | 0            | 0            | 0         |
| Natural forest    | 4                 | 104            | 0         | 0        | 2            | 11     | 0            | 0            | 0         |
| Buildings         | 0                 | 0              | 103       | 0        | 0            | 0      | 0            | 0            | 12        |
| Farmland          | 0                 | 0              | 0         | 99       | 2            | 0      | 0            | 0            | 0         |
| HC grassland      | 11                | 9              | 0         | 11       | 83           | 4      | 0            | 0            | 0         |
| Shrubs            | 4                 | 5              | 0         | 0        | 2            | 86     | 0            | 0            | 0         |
| Mixed forest      | 0                 | 0              | 0         | 0        | 0            | 0      | 98           | 15           | 0         |
| LC grassland      | 0                 | 0              | 0         | 0        | 0            | 0      | 28           | 95           | 0         |
| Bare land         | 0                 | 0              | 7         | 0        | 0            | 0      | 0            | 0            | 88        |
| User accuracy     | 87%               | 86%            | 90%       | 98%      | 70%          | 90%    | 86%          | 77%          | 93%       |
| Producer accuracy | 86%               | 87%            | 94%       | 90%      | 83%          | 82%    | 78%          | 86%          | 88%       |
| Overall accuracy  | 85.91%            |                |           |          |              |        |              |              |           |
| Kappa coefficient | 0.8441            |                |           |          |              |        |              |              |           |

| 2000              | Cultivated forest | Natural forest | Buildings | Farmland | HC grassland | Shrubs | Mixed forest | LC grassland | Bare land |
|-------------------|-------------------|----------------|-----------|----------|--------------|--------|--------------|--------------|-----------|
| Cultivated forest | 79                | 2              | 0         | 0        | 13           | 2      | 0            | 0            | 0         |
| Natural forest    | 3                 | 90             | 0         | 0        | 3            | 12     | 0            | 0            | 0         |

[illegible][illegible][illegible]

| 2003              | Cultivated forest | Natural forest | Buildings | Farmland | HC grassland | Shrubs | Mixed forest | LC grassland | Bare land |
|-------------------|-------------------|----------------|-----------|----------|--------------|--------|--------------|--------------|-----------|
| Cultivated forest | 94                | 3              | 0         | 0        | 7            | 3      | 0            | 0            | 0         |
| Natural forest    | 8                 | 100            | 0         | 0        | 2            | 5      | 0            | 0            | 0         |
| Buildings         | 0                 | 0              | 100       | 0        | 0            | 0      | 0            | 0            | 13        |
| Farmland          | 0                 | 0              | 0         | 120      | 3            | 0      | 0            | 0            | 0         |
| HC grassland      | 27                | 22             | 0         | 12       | 94           | 5      | 0            | 0            | 0         |
| Shrubs            | 4                 | 6              | 0         | 0        | 5            | 87     | 0            | 0            | 0         |
| Mixed forest      | 0                 | 0              | 0         | 0        | 0            | 0      | 85           | 29           | 0         |
| LC grassland      | 0                 | 0              | 0         | 0        | 0            | 0      | 25           | 76           | 0         |
| Bare land         | 0                 | 0              | 10        | 0        | 0            | 0      | 0            | 0            | 119       |
| User accuracy     | 88%               | 87%            | 88%       | 97%      | 59%          | 85%    | 74%          | 75%          | 92%       |
| Producer accuracy | 71%               | 76%            | 91%       | 91%      | 85%          | 87%    | 77%          | 72%          | 90%       |
| Overall accuracy  | 82.21%            |                |           |          |              |        |              |              |           |
| Kappa coefficient | 0.8040            |                |           |          |              |        |              |              |           |

| 2004              | Cultivated forest | Natural forest | Buildings | Farmland | HC grassland | Shrubs | Mixed forest | LC grassland | Bare land |
|-------------------|-------------------|----------------|-----------|----------|--------------|--------|--------------|--------------|-----------|
| Cultivated forest | 74                | 2              | 0         | 0        | 11           | 6      | 0            | 0            | 0         |
| Natural forest    | 6                 | 84             | 0         | 0        | 5            | 19     | 0            | 0            | 0         |
| Buildings         | 0                 | 0              | 115       | 0        | 0            | 0      | 0            | 0            | 11        |
| Farmland          | 0                 | 0              | 0         | 115      | 5            | 0      | 0            | 0            | 0         |
| HC grassland      | 22                | 10             | 0         | 11       | 100          | 6      | 0            | 0            | 0         |
| Shrubs            | 3                 | 5              | 0         | 0        | 5            | 100    | 0            | 0            | 0         |
| Mixed forest      | 0                 | 0              | 0         | 0        | 0            | 0      | 103          | 25           | 0         |
| LC grassland      | 0                 | 0              | 0         | 0        | 0            | 0      | 17           | 75           | 0         |
| Bare land         | 0                 | 0              | 11        | 0        | 0            | 0      | 0            | 0            | 95        |
| User accuracy     | 80%               | 73%            | 92%       | 96%      | 67%          | 88%    | 80%          | 82%          | 89%       |
| Producer accuracy | 70%               | 84%            | 91%       | 91%      | 79%          | 76%    | 86%          | 75%          | 90%       |
| Overall accuracy  | 82.63%            |                |           |          |              |        |              |              |           |
| Kappa coefficient | 0.8085            |                |           |          |              |        |              |              |           |

| 2005              | Cultivated forest | Natural forest | Buildings | Farmland | HC grassland | Shrubs | Mixed forest | LC grassland | Bare land |
|-------------------|-------------------|----------------|-----------|----------|--------------|--------|--------------|--------------|-----------|
| Cultivated forest | 100               | 2              | 0         | 0        | 14           | 2      | 0            | 0            | 0         |
| Natural forest    | 3                 | 110            | 0         | 0        | 3            | 11     | 0            | 0            | 0         |
| Buildings         | 0                 | 0              | 101       | 0        | 0            | 0      | 0            | 0            | 19        |
| Farmland          | 0                 | 0              | 0         | 97       | 3            | 0      | 0            | 0            | 0         |
| HC grassland      | 22                | 16             | 0         | 8        | 91           | 3      | 0            | 0            | 0         |
| Shrubs            | 6                 | 4              | 0         | 0        | 9            | 95     | 0            | 0            | 0         |
| Mixed forest      | 0                 | 0              | 0         | 0        | 0            | 0      | 117          | 28           | 0         |
| LC grassland      | 0                 | 0              | 0         | 0        | 0            | 0      | 15           | 77           | 0         |
| Bare land         | 0                 | 0              | 9         | 0        | 0            | 0      | 0            | 0            | 107       |
| User accuracy     | 85%               | 87%            | 84%       | 97%      | 65%          | 83%    | 81%          | 84%          | 92%       |

|                   |        |     |     |     |     |     |     |     |     |
|-------------------|--------|-----|-----|-----|-----|-----|-----|-----|-----|
| Producer accuracy | 76%    | 83% | 92% | 92% | 76% | 86% | 89% | 73% | 85% |
| Overall accuracy  | 83.46% |     |     |     |     |     |     |     |     |
| Kappa coefficient | 0.8176 |     |     |     |     |     |     |     |     |

| 2006              | Cultivated forest | Natural forest | Buildings | Farmland | HC grassland | Shrubs | Mixed forest | LC grassland | Bare land |
|-------------------|-------------------|----------------|-----------|----------|--------------|--------|--------------|--------------|-----------|
| Cultivated forest | 100               | 1              | 0         | 0        | 8            | 2      | 0            | 0            | 0         |
| Natural forest    | 4                 | 99             | 0         | 0        | 2            | 11     | 0            | 0            | 0         |
| Buildings         | 0                 | 0              | 105       | 0        | 0            | 0      | 0            | 0            | 17        |
| Farmland          | 0                 | 0              | 0         | 100      | 2            | 0      | 0            | 0            | 0         |
| HC grassland      | 14                | 9              | 0         | 10       | 111          | 3      | 0            | 0            | 0         |
| Shrubs            | 2                 | 1              | 0         | 0        | 5            | 95     | 0            | 0            | 0         |
| Mixed forest      | 0                 | 0              | 0         | 0        | 0            | 0      | 114          | 37           | 0         |
| LC grassland      | 0                 | 0              | 0         | 0        | 0            | 0      | 18           | 89           | 0         |
| Bare land         | 0                 | 0              | 6         | 0        | 0            | 0      | 0            | 0            | 103       |
| User accuracy     | 91%               | 86%            | 86%       | 99%      | 75%          | 92%    | 76%          | 83%          | 95%       |
| Producer accuracy | 83%               | 90%            | 95%       | 91%      | 88%          | 86%    | 86%          | 71%          | 86%       |
| Overall accuracy  | 85.98%            |                |           |          |              |        |              |              |           |
| Kappa coefficient | 0.8450            |                |           |          |              |        |              |              |           |

| 2007              | Cultivated forest | Natural forest | Buildings | Farmland | HC grassland | Shrubs | Mixed forest | LC grassland | Bare land |
|-------------------|-------------------|----------------|-----------|----------|--------------|--------|--------------|--------------|-----------|
| Cultivated forest | 89                | 2              | 0         | 0        | 16           | 1      | 0            | 0            | 0         |
| Natural forest    | 4                 | 95             | 0         | 0        | 5            | 8      | 0            | 0            | 0         |
| Buildings         | 0                 | 0              | 120       | 0        | 0            | 0      | 0            | 0            | 18        |
| Farmland          | 0                 | 0              | 0         | 107      | 3            | 0      | 0            | 0            | 0         |
| HC grassland      | 29                | 9              | 0         | 13       | 100          | 4      | 0            | 0            | 0         |
| Shrubs            | 4                 | 5              | 0         | 0        | 3            | 119    | 0            | 0            | 0         |
| Mixed forest      | 0                 | 0              | 0         | 0        | 0            | 0      | 83           | 29           | 0         |
| LC grassland      | 0                 | 0              | 0         | 0        | 0            | 0      | 22           | 71           | 0         |
| Bare land         | 0                 | 0              | 6         | 0        | 0            | 0      | 0            | 0            | 87        |
| User accuracy     | 83%               | 85%            | 87%       | 98%      | 64%          | 92%    | 74%          | 76%          | 93%       |
| Producer accuracy | 71%               | 86%            | 95%       | 89%      | 79%          | 90%    | 79%          | 71%          | 83%       |
| Overall accuracy  | 82.86%            |                |           |          |              |        |              |              |           |
| Kappa coefficient | 0.8110            |                |           |          |              |        |              |              |           |

| 2008              | Cultivated forest | Natural forest | Buildings | Farmland | HC grassland | Shrubs | Mixed forest | LC grassland | Bare land |
|-------------------|-------------------|----------------|-----------|----------|--------------|--------|--------------|--------------|-----------|
| Cultivated forest | 98                | 7              | 0         | 0        | 11           | 3      | 0            | 0            | 0         |
| Natural forest    | 4                 | 99             | 0         | 0        | 6            | 18     | 0            | 0            | 0         |
| Buildings         | 0                 | 0              | 102       | 0        | 0            | 0      | 0            | 0            | 17        |
| Farmland          | 0                 | 0              | 0         | 92       | 8            | 0      | 0            | 0            | 0         |
| HC grassland      | 11                | 17             | 0         | 13       | 92           | 5      | 0            | 0            | 0         |
| Shrubs            | 6                 | 10             | 0         | 0        | 3            | 107    | 0            | 0            | 0         |

|                   |        |     |     |     |     |     |     |     |     |
|-------------------|--------|-----|-----|-----|-----|-----|-----|-----|-----|
| Mixed forest      | 0      | 0   | 0   | 0   | 0   | 0   | 103 | 15  | 0   |
| LC grassland      | 0      | 0   | 0   | 0   | 0   | 0   | 23  | 95  | 0   |
| Bare land         | 0      | 0   | 8   | 0   | 0   | 0   | 0   | 0   | 115 |
| User accuracy     | 83%    | 78% | 86% | 92% | 67% | 85% | 87% | 81% | 94% |
| Producer accuracy | 82%    | 75% | 93% | 88% | 77% | 81% | 82% | 86% | 87% |
| Overall accuracy  | 83.18% |     |     |     |     |     |     |     |     |
| Kappa coefficient | 0.8146 |     |     |     |     |     |     |     |     |

| 2009              | Cultivated forest | Natural forest | Buildings | Farmland | HC grassland | Shrubs | Mixed forest | LC grassland | Bare land |
|-------------------|-------------------|----------------|-----------|----------|--------------|--------|--------------|--------------|-----------|
| Cultivated forest | 95                | 3              | 0         | 0        | 11           | 3      | 0            | 0            | 0         |
| Natural forest    | 1                 | 74             | 0         | 0        | 6            | 5      | 0            | 0            | 0         |
| Buildings         | 0                 | 0              | 108       | 0        | 0            | 0      | 0            | 0            | 11        |
| Farmland          | 0                 | 0              | 0         | 100      | 3            | 0      | 0            | 0            | 0         |
| HC grassland      | 7                 | 18             | 0         | 10       | 92           | 5      | 0            | 0            | 0         |
| Shrubs            | 2                 | 5              | 0         | 0        | 8            | 91     | 0            | 0            | 0         |
| Mixed forest      | 0                 | 0              | 0         | 0        | 0            | 0      | 85           | 20           | 0         |
| LC grassland      | 0                 | 0              | 0         | 0        | 0            | 0      | 15           | 112          | 0         |
| Bare land         | 0                 | 0              | 12        | 0        | 0            | 0      | 0            | 0            | 99        |
| User accuracy     | 85%               | 86%            | 91%       | 97%      | 69%          | 85%    | 81%          | 88%          | 89%       |
| Producer accuracy | 90%               | 74%            | 90%       | 91%      | 77%          | 87%    | 85%          | 85%          | 90%       |
| Overall accuracy  | 85.48%            |                |           |          |              |        |              |              |           |
| Kappa coefficient | 0.8395            |                |           |          |              |        |              |              |           |

| 2010              | Cultivated forest | Natural forest | Buildings | Farmland | HC grassland | Shrubs | Mixed forest | LC grassland | Bare land |
|-------------------|-------------------|----------------|-----------|----------|--------------|--------|--------------|--------------|-----------|
| Cultivated forest | 82                | 2              | 0         | 0        | 11           | 3      | 0            | 0            | 0         |
| Natural forest    | 2                 | 102            | 0         | 0        | 4            | 18     | 0            | 0            | 0         |
| Buildings         | 0                 | 0              | 95        | 0        | 0            | 0      | 0            | 0            | 15        |
| Farmland          | 0                 | 0              | 0         | 88       | 2            | 0      | 0            | 0            | 0         |
| HC grassland      | 11                | 19             | 0         | 12       | 107          | 5      | 0            | 0            | 0         |
| Shrubs            | 5                 | 2              | 0         | 0        | 2            | 106    | 0            | 0            | 0         |
| Mixed forest      | 0                 | 0              | 0         | 0        | 0            | 0      | 114          | 23           | 0         |
| LC grassland      | 0                 | 0              | 0         | 0        | 0            | 0      | 18           | 77           | 0         |
| Bare land         | 0                 | 0              | 11        | 0        | 0            | 0      | 0            | 0            | 85        |
| User accuracy     | 83%               | 81%            | 86%       | 98%      | 69%          | 92%    | 83%          | 81%          | 89%       |
| Producer accuracy | 82%               | 81%            | 90%       | 88%      | 85%          | 80%    | 86%          | 77%          | 85%       |
| Overall accuracy  | 83.72%            |                |           |          |              |        |              |              |           |
| Kappa coefficient | 0.8202            |                |           |          |              |        |              |              |           |

| 2011              | Cultivated forest | Natural forest | Buildings | Farmland | HC grassland | Shrubs | Mixed forest | LC grassland | Bare land |
|-------------------|-------------------|----------------|-----------|----------|--------------|--------|--------------|--------------|-----------|
| Cultivated forest | 79                | 1              | 0         | 0        | 9            | 1      | 0            | 0            | 0         |
| Natural forest    | 4                 | 106            | 0         | 0        | 2            | 7      | 0            | 0            | 0         |

[illegible][illegible][illegible]

| 2015               | Cultivated forest | Natural forest | Buildings | Farmland | HC grassland | Shrubs | Mixed forest | LC grassland | Bare land | Photovoltaic panel |
|--------------------|-------------------|----------------|-----------|----------|--------------|--------|--------------|--------------|-----------|--------------------|
| Cultivated forest  | 97                | 1              | 0         | 0        | 15           | 2      | 0            | 0            | 0         | 97                 |
| Natural forest     | 6                 | 106            | 0         | 0        | 5            | 8      | 0            | 0            | 0         | 6                  |
| Buildings          | 0                 | 0              | 117       | 0        | 0            | 0      | 0            | 0            | 21        | 0                  |
| Farmland           | 0                 | 0              | 0         | 92       | 2            | 0      | 0            | 0            | 0         | 0                  |
| HC grassland       | 14                | 9              | 0         | 8        | 86           | 6      | 0            | 0            | 0         | 14                 |
| Shrubs             | 9                 | 4              | 0         | 0        | 2            | 85     | 0            | 0            | 0         | 9                  |
| Mixed forest       | 0                 | 0              | 0         | 0        | 0            | 0      | 111          | 15           | 0         | 0                  |
| LC grassland       | 0                 | 0              | 0         | 0        | 0            | 0      | 15           | 90           | 0         | 0                  |
| Bare land          | 0                 | 0              | 9         | 0        | 0            | 0      | 0            | 0            | 105       | 0                  |
| Photovoltaic panel | 85%               | 85%            | 85%       | 97%      | 70%          | 85%    | 88%          | 86%          | 92%       | 85%                |
| User accuracy      | 77%               | 88%            | 93%       | 92%      | 78%          | 85%    | 88%          | 86%          | 83%       | 77%                |
| Producer accuracy  | 97                | 1              | 0         | 0        | 15           | 2      | 0            | 0            | 0         | 97                 |
| Overall accuracy   | 85.50%            |                |           |          |              |        |              |              |           |                    |
| Kappa coefficient  | 0.8397            |                |           |          |              |        |              |              |           |                    |

| 2016               | Cultivated forest | Natural forest | Buildings | Farmland | HC grassland | Shrubs | Mixed forest | LC grassland | Bare land | Photovoltaic panel |
|--------------------|-------------------|----------------|-----------|----------|--------------|--------|--------------|--------------|-----------|--------------------|
| Cultivated forest  | 116               | 3              | 0         | 0        | 9            | 3      | 0            | 0            | 0         | 116                |
| Natural forest     | 3                 | 104            | 0         | 0        | 3            | 8      | 0            | 0            | 0         | 3                  |
| Buildings          | 0                 | 0              | 121       | 0        | 0            | 0      | 0            | 0            | 14        | 0                  |
| Farmland           | 0                 | 0              | 0         | 101      | 2            | 0      | 0            | 0            | 0         | 0                  |
| HC grassland       | 8                 | 8              | 0         | 9        | 89           | 3      | 0            | 0            | 0         | 8                  |
| Shrubs             | 5                 | 5              | 0         | 0        | 2            | 87     | 0            | 0            | 0         | 5                  |
| Mixed forest       | 0                 | 0              | 0         | 0        | 0            | 0      | 96           | 25           | 0         | 0                  |
| LC grassland       | 0                 | 0              | 0         | 0        | 0            | 0      | 30           | 85           | 0         | 0                  |
| Bare land          | 0                 | 0              | 11        | 0        | 0            | 0      | 0            | 0            | 106       | 0                  |
| Photovoltaic panel | 88%               | 88%            | 89%       | 98%      | 77%          | 89%    | 79%          | 74%          | 91%       | 88%                |
| User accuracy      | 88%               | 87%            | 92%       | 92%      | 85%          | 87%    | 76%          | 77%          | 88%       | 88%                |
| Producer accuracy  | 116               | 3              | 0         | 0        | 9            | 3      | 0            | 0            | 0         | 116                |
| Overall accuracy   | 85.83%            |                |           |          |              |        |              |              |           |                    |
| Kappa coefficient  | 0.8432            |                |           |          |              |        |              |              |           |                    |

| 2017              | Cultivated forest | Natural forest | Buildings | Farmland | HC grassland | Shrubs | Mixed forest | LC grassland | Bare land | Photovoltaic panel |
|-------------------|-------------------|----------------|-----------|----------|--------------|--------|--------------|--------------|-----------|--------------------|
| Cultivated forest | 119               | 2              | 0         | 0        | 8            | 3      | 0            | 0            | 0         | 119                |
| Natural forest    | 1                 | 106            | 0         | 0        | 2            | 8      | 0            | 0            | 0         | 1                  |
| Buildings         | 0                 | 0              | 95        | 0        | 0            | 0      | 0            | 0            | 25        | 0                  |
| Farmland          | 0                 | 0              | 0         | 116      | 2            | 0      | 0            | 0            | 0         | 0                  |
| HC grassland      | 9                 | 14             | 0         | 16       | 85           | 5      | 0            | 0            | 0         | 9                  |
| Shrubs            | 3                 | 4              | 0         | 0        | 5            | 111    | 0            | 0            | 0         | 3                  |

|                    |        |     |     |     |     |     |     |     |     |     |
|--------------------|--------|-----|-----|-----|-----|-----|-----|-----|-----|-----|
| Mixed forest       | 0      | 0   | 0   | 0   | 0   | 0   | 103 | 16  | 0   | 0   |
| LC grassland       | 0      | 0   | 0   | 0   | 0   | 0   | 17  | 84  | 0   | 0   |
| Bare land          | 0      | 0   | 5   | 0   | 0   | 0   | 0   | 0   | 101 | 0   |
| Photovoltaic panel | 90%    | 91% | 79% | 99% | 66% | 91% | 87% | 83% | 95% | 90% |
| User accuracy      | 90%    | 84% | 95% | 88% | 85% | 88% | 86% | 84% | 80% | 90% |
| Producer accuracy  | 119    | 2   | 0   | 0   | 8   | 3   | 0   | 0   | 0   | 119 |
| Overall accuracy   | 86.60% |     |     |     |     |     |     |     |     |     |
| Kappa coefficient  | 0.8515 |     |     |     |     |     |     |     |     |     |
